# Supplementary material for: Engineering metal–organic frameworks for adsorption-based gas separations: from process to atomic scale
Source: Royal Society of Chemistry journal article supplement (doi:10.1039/d1me00085c), 2021-01-01
Supplement: d1me00085c1.pdf [file d1me00085c1.pdf]

## **Engineering metal-organic frameworks for adsorption-based gas separations: from process to atomic scale**

*Marco Taddei<sup>a,\*</sup> and Camille Petit<sup>b,\*</sup>*

<sup>a</sup> *Department of Chemistry and Industrial Chemistry, University of Pisa, Via Giuseppe Moruzzi, 13, 56124, Pisa, Italy. Email: [marco.taddei@unipi.it](mailto:marco.taddei@unipi.it)*

<sup>b</sup> *Barrer Centre, Department of Chemical Engineering, Imperial College London, South Kensington Campus, London SW7 2AZ, UK. E-mail: [camille.petit@imperial.ac.uk](mailto:camille.petit@imperial.ac.uk)*

### **SUPPORTING INFORMATION**

We note that MOFs are usually named according to a non-systematic method that involves the use of acronyms that are most often derived from the name of the institution where they were first discovered, associated with a number. In the following, we report the acronym meaning, the structural formula of the organic linkers, the metal ion, the chemical formula, and the CSD refcode for each MOF mentioned in the main text. The MOFs are listed in order of appearance in the main text, as follows:

- [CALF-20](#)
- [MIL-160](#)
- [Ca-trimesate](#)
- [CALF-15](#)
- [UTSA-16](#)
- [IISERP-MOF-2](#)
- [SIFSIX-2-Cu-i](#)
- [UiO-66](#)
- [MIL-140A](#)
- [Co-bdp](#)
- [MIL-88](#)
- [DUT-49](#)
- [MIL-53\(Al\)](#)
- [ELM-11, ELM-12](#)
- [ZIF-8](#)
- [Basolite-A520](#)
- [DUT-5](#)
- [SBMOF-1](#)
- [MUF-15](#)
- [UTSA-280](#)
- [\[Mg<sub>2</sub>\(dobpdc\)\]](#)
- [\[Cr<sub>3</sub>\(btc\)<sub>2</sub>\]](#)
- [MOF-74\(Fe\)](#)
- [MIL-100\(Cr\)](#)
- [\[V<sub>2</sub>Cl<sub>2.8</sub>\(btdd\)\]](#)

## CALF-20

*Acronym meaning:*

CALF = CALgary Framework

*Linkers:*

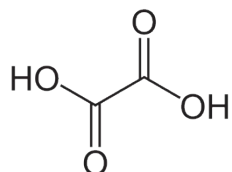

Oxalic acid (H<sub>2</sub>ox)

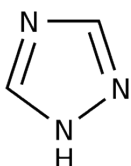

1,2,4-triazole (Htrz)

*Metal ion:*

Zn<sup>II</sup>

*Chemical formula:*

[Zn<sub>2</sub>(ox)(trz)<sub>2</sub>]

*CSD refcode:*

Crystallographic data not deposited - structure presumed analogous to [CALF-15](#)

## MIL-160

*Acronym meaning:*

MIL = Material of Institut Lavoisier

*Linker:*

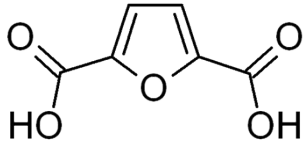

2,5-furandicarboxylic acid (H<sub>2</sub>fdc)

*Metal ion:*

Al<sup>III</sup>

*Chemical formula:*

[Al(OH)(fdc)]

*CSD refcode:*

PIBZOS

## Ca-trimesate

*Linker:*

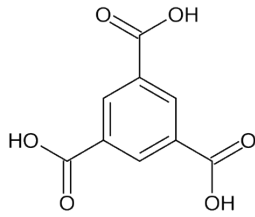

1,3,5-benzenetricarboxylic acid (H<sub>3</sub>btc), aka trimesic acid

*Metal ion:*

Ca<sup>II</sup>

*Chemical formula:*

[Ca(Hbtc)(H<sub>2</sub>O)]

*CSD refcode:*

RUFMUA

## CALF-15

*Acronym meaning:*

CALF = CALgary Framework

*Linkers:*

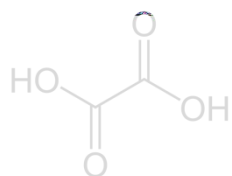

Oxalic acid (H<sub>2</sub>ox)

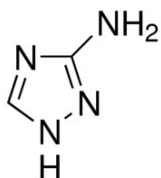

3-amino-1,2,4-triazole (Hatrz)

*Metal ion:*

Zn<sup>II</sup>

*Chemical formula:*

[Zn<sub>2</sub>(ox)(atrz)<sub>2</sub>]

*CSD refcode:*

MUDKOM

## UTSA-16

*Acronym meaning:*

UTSA = University of Texas San Antonio

*Linker:*

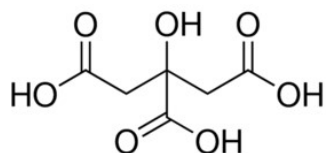

Citric acid (H<sub>4</sub>cit)

*Metal ions:*

Co<sup>II</sup>, K<sup>I</sup>

*Chemical formula:*

[K<sub>2</sub>Co<sub>3</sub>(cit)<sub>2</sub>]

*CSD refcode:*

RAZXIA

## IISERP-MOF-2

*Acronym meaning:*

IISERP = Indian Institute of Science Education and Research Pune

*Linker:*

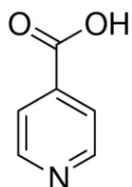

4-pyridinecarboxylic acid (HPyC), aka isonicotinic acid

*Metal ion:*

Ni<sup>II</sup>

*Chemical formula:*

[Ni(PyC)<sub>2</sub>]

*CSD refcode:*

ACICOH



## SIFSIX-2-Cu-i

*Acronym meaning:*

SIFSIX =  $\text{SiF}_6^{2-}$  (inorganic anion contained in the MOF)

i = interpenetrated isomer

*Linker:*

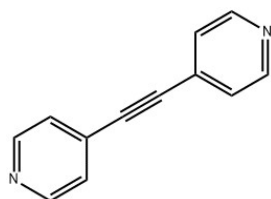

4,4'-dipyridylacetylene (dpa)

*Metal ion:*

$\text{Cu}^{\text{II}}$

*Chemical formula:*

$[\text{Cu}(\text{SiF}_6)(\text{dpa})_2]$

*CSD refcode:*

YEMTIV

## UiO-66

*Acronym meaning:*

UiO = Universitetet i Oslo

*Linkers:*

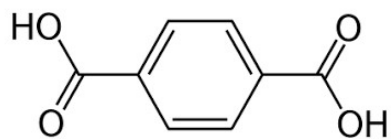

1,4-benzenedicarboxylic acid (H<sub>2</sub>bdc), aka terephthalic acid

*Metal ion:*

Zr<sup>IV</sup>

*Chemical formula:*

[Zr<sub>6</sub>O<sub>4</sub>(OH)<sub>4</sub>(bdc)<sub>6</sub>]

*CSD refcode:*

RUBTAK

## MIL-140A

*Acronym meaning:*

MIL = Material of Institut Lavoisier

*Linkers:*

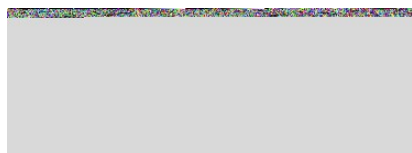

1,4-benzenedicarboxylic acid (H<sub>2</sub>bdc), aka terephthalic acid

*Metal ion:*

Zr<sup>IV</sup>

*Chemical formula:*

[ZrO(bdc)]

*CSD refcode:*

ZONBAH

## Co-bdp

*Linker:*

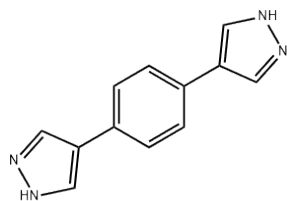

1,4-Di(1H-pyrazol-4-yl)benzene (H<sub>2</sub>bdp)

*Metal ion:*

Co<sup>II</sup>

*Chemical formula:*

[Co(bdp)]

*CSD refcode:*

COJHIT

## MIL-88

*Acronym meaning:*

MIL = Material of Institut Lavoisier

*Linker:*

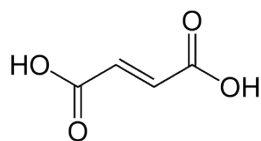

Fumaric acid (H<sub>2</sub>fum)

*Metal ions:*

Fe<sup>III</sup>

*Chemical formula:*

[Fe<sub>3</sub>O(CH<sub>3</sub>OH)<sub>3</sub>(fum)<sub>3</sub>·(CH<sub>3</sub>COO)]

*CSD refcode:*

FAVKAP

## DUT-49

*Acronym meaning:*

DUT = Dresden University of Technology

*Linker:*

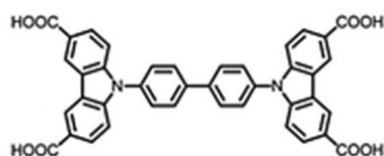

9,9'-([1,1'-biphenyl]-4,4'-diyl)bis(9H-carbazole-3,6-dicarboxylic acid) (H<sub>4</sub>bbc dc)

*Metal ions:*

Cu<sup>II</sup>

*Chemical formula:*

[Cu<sub>2</sub>(BBCDC)]

*CSD refcode:*

ACOCOM

## MIL-53(Al)

*Acronym meaning:*

MIL = Material of Institut Lavoisier

*Linker:*



1,4-benzenedicarboxylic acid (H<sub>2</sub>bdc), aka terephthalic acid

*Metal ions:*

Al<sup>III</sup>

*Chemical formula:*

[Al(OH)(bdc)]

*CSD refcode:*

SABVUN

## ELM-11, ELM-12

*Acronym meaning:*

ELM = Elastic Layered Material

*Linker:*

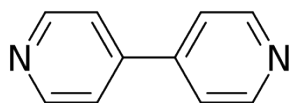

4,4'-bipyridine (bipy)

*Metal ions:*

Cu<sup>II</sup>

*Chemical formula:*

ELM-11: [Cu(BF<sub>4</sub>)<sub>2</sub>(bipy)<sub>2</sub>]

ELM-12: [Cu(CF<sub>3</sub>SO<sub>3</sub>)<sub>2</sub>(bipy)<sub>2</sub>]

*CSD refcode:*

UXUPAF (ELM-12)



## ZIF-8

*Acronym meaning:*

ZIF = Zeolitic imidazolate framework

*Linker:*

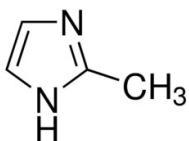

2-methylimidazole (Hmeim)

*Metal ions:*

Zn<sup>II</sup>

*Chemical formula:*

[Zn(meim)<sub>2</sub>]

*CSD refcode:*

VELVOY

## Basolite-A520

*Acronym meaning:*

Basolite is the commercial name under which BASF sells this MOF

*Linker:*

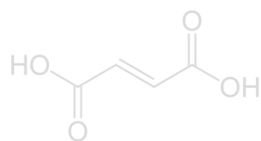

Fumaric acid (H<sub>2</sub>fum)

*Metal ions:*

Al<sup>III</sup>

*Chemical formula:*

[Al(OH)(fum)]

*CSD refcode:*

DOYBEA

## DUT-5

*Acronym meaning:*

DUT = Dresden University of Technology

*Linker:*

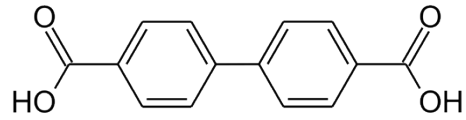

4,4'-biphenyldicarboxylic acid (H<sub>2</sub>bpdc)

*Metal ions:*

Al<sup>III</sup>

*Chemical formula:*

[Al(OH)(bpdc)]

*CSD refcode:*

Crystallographic data not deposited - structure presumed isorecticular to [MIL-53\(Al\)](#)

## SBMOF-1

*Acronym meaning:*

Not defined, "SB" presumably refers to the sulfonylbenzoate linker

*Linker:*

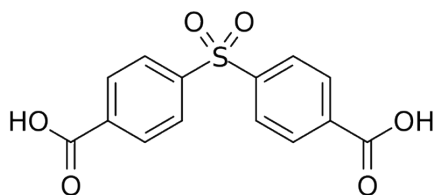

4,4'-sulfonyldibenzoic acid (H<sub>2</sub>sdb)

*Metal ions:*

Ca<sup>II</sup>

*Chemical formula:*

[Ca(sdb)]

*CSD refcode:*

KAXQIL

## MUF-15

*Acronym meaning:*

MUF = Massey University Framework

*Linker:*

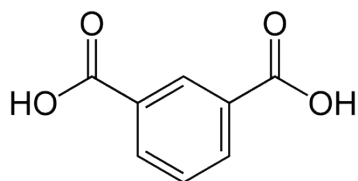

1,3-benzenedicarboxylic acid, aka isophthalic acid (H<sub>2</sub>ipa)

*Metal ions:*

Co<sup>II</sup>

*Chemical formula:*

[Co<sub>3</sub>(OH)(ipa)<sub>2.5</sub>(H<sub>2</sub>O)]

*CSD refcode:*

HIXNEK

## UTSA-280

*Acronym meaning:*

UTSA = University of Texas San Antonio

*Linker:*

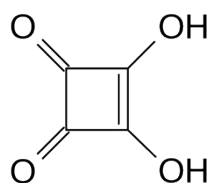

Squaric acid (H<sub>2</sub>sqa)

*Metal ions:*

Ca<sup>II</sup>

*Chemical formula:*

[Ca(sqa)(H<sub>2</sub>O)]

*CSD refcode:*

FIRVEH

## [Mg<sub>2</sub>(dobpdc)]

*Linker:*

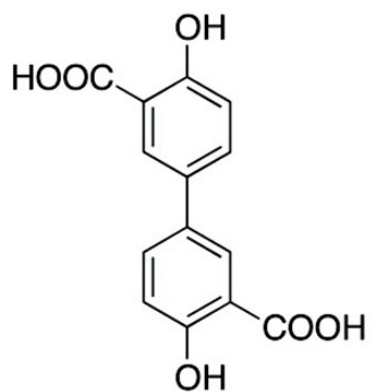

4,4'-dioxidobiphenyl-3,3'-dicarboxylic acid (H<sub>2</sub>dobpdc)

*Metal ions:*

Mg<sup>II</sup>

*Chemical formula:*

[Mg<sub>2</sub>(dobpdc)]

*CSD refcode:*

XUXPUD

## **[Cr<sub>3</sub>(btc)<sub>2</sub>]**

*Linker:*

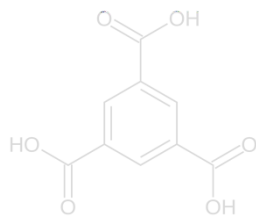

1,3,5-benzenetricarboxylic acid (H<sub>3</sub>btc), aka trimesic acid

*Metal ions:*

Cr<sup>III</sup>

*Chemical formula:*

[Cr<sub>3</sub>(btc)<sub>2</sub>]

*CSD refcode:*

ZIGFEC



## MOF-74(Fe), aka CPO-27(Fe)

*Acronym meaning:*

CPO = Coordination polymer of Oslo

*Linker:*

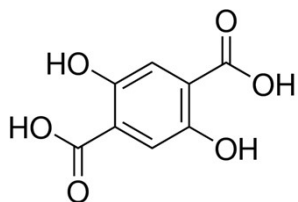

2,5-dihydroxy-1,4-benzenedicarboxylic acid (H<sub>4</sub>dobdc)

*Metal ions:*

Fe<sup>II</sup>

*Chemical formula:*

[Fe<sub>2</sub>(dobdc)]

*CSD refcode:*

COKNOH01

## MIL-100(Cr)

*Acronym meaning:*

MIL = Material of Institut Lavoisier

*Linker:*

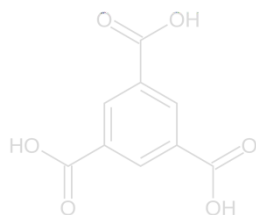

1,3,5-benzenetricarboxylic acid (H<sub>3</sub>btc), aka trimesic acid

*Metal ions:*

Cr<sup>III</sup>

*Chemical formula:*

[Cr<sub>3</sub>O(H<sub>2</sub>O)<sub>2</sub>(OH)(btc)<sub>2</sub>]

*CSD refcode:*

UDEM EW

**[V<sub>2</sub>Cl<sub>2.8</sub>(btdd)]**

*Linker:*

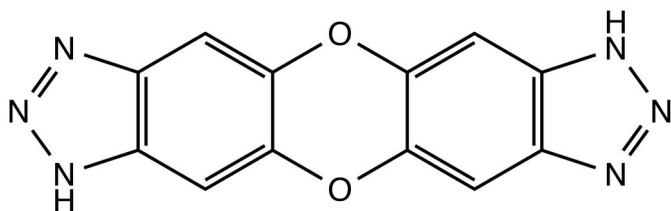

bis(1*H*-1,2,3-triazolo[4,5-*b*],[4',5'-*i*])dibenzo[1,4]dioxin (H<sub>2</sub>btdd)

*Metal ions:*

V<sup>II</sup>/V<sup>III</sup>

*Chemical formula:*

[V<sub>2</sub>Cl<sub>2.8</sub>(btdd)]

*CSD refcode:*

OVUNIE (Mn<sup>II</sup> analogue)
